# Supplementary material
Source: PubMed Central journal article supplement (PMC6372263)
Supplement: mmc1.pdf [file mmc1.pdf]

**Supplemental Data**

**Lack of *GAS2L2* Causes PCD by Impairing Cilia**

**Orientation and Mucociliary Clearance**

**Ximena M. Bustamante-Marin, Wei-Ning Yin, Patrick R. Sears, Michael E. Werner, Eva J. Brotslaw, Brian J. Mitchell, Corey M. Jania, Kirby L. Zeman, Troy D. Rogers, Laura E. Herring, Luc Refabért, Lucie Thomas, Serge Amselem, Estelle Escudier, Marie Legendre, Barbara R. Grubb, Michael R. Knowles, Maimoona A. Zariwala, and Lawrence E. Ostrowski**

## SUPPLEMENTAL DATA

### SUPPLEMENTAL FIGURES

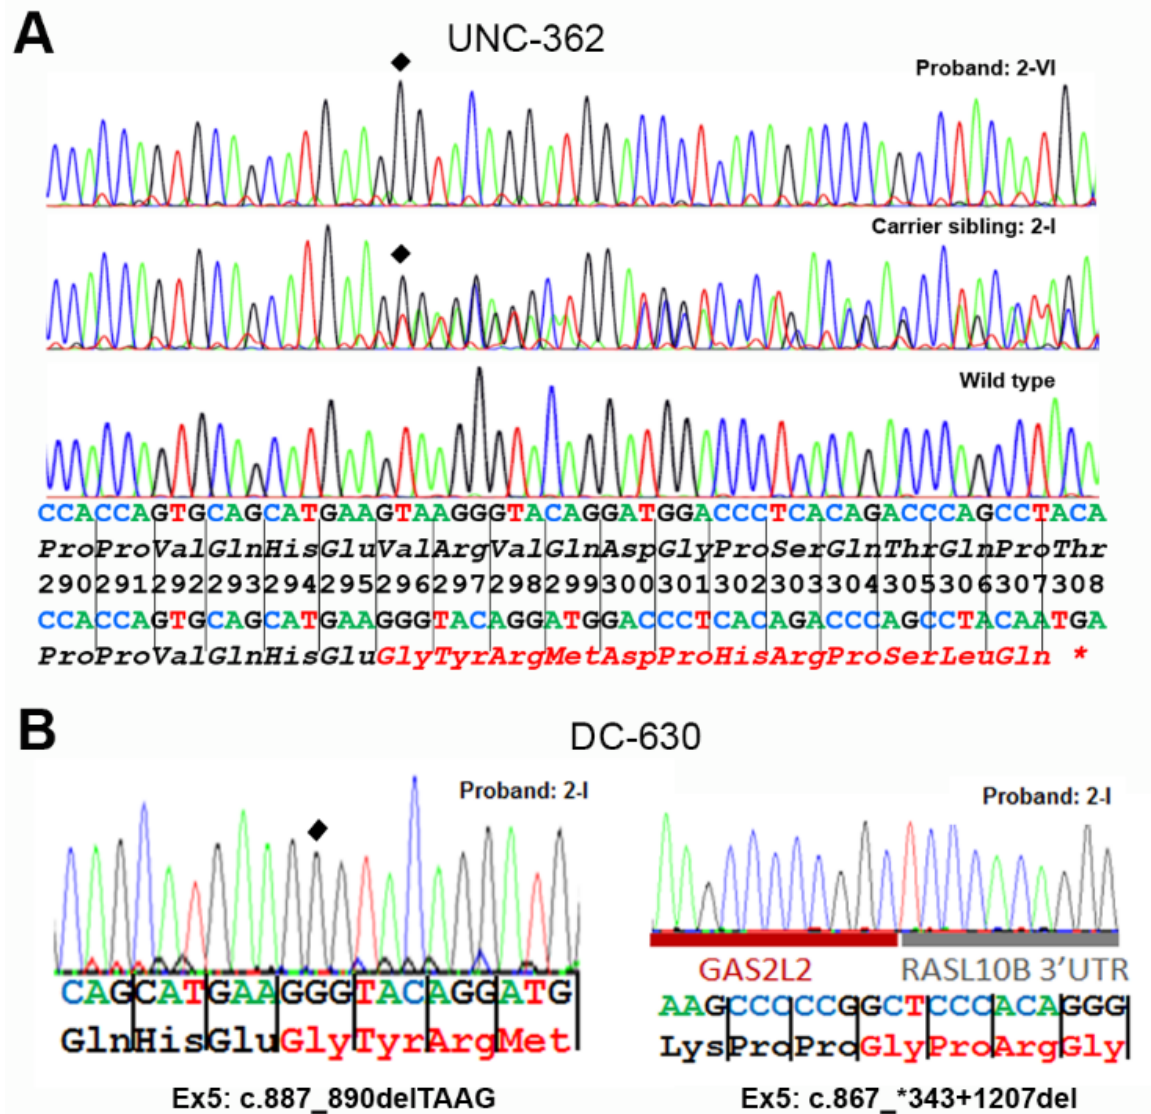

**Figure S1: Sanger sequencing of pathogenic genetic variants discovered in *GAS2L2*.**

(A) Sequencing of pathogenic variant [c.887\_890delTAAG (p.Val296Glyfs\*13)] in exon 5 of *GAS2L2* (NM\_139285.3, Chr.17q12) in affected subject PCD-1367 (2-IV) of family UNC-362, (top), heterozygous (middle) and wild type (bottom). The variant (filled diamond) induces a frameshift in the gene sequence leading to a stop codon in amino acid 308 during translation.

(B) Sequencing of compound heterozygous variants [c.[887\_890del];[867\_\*343+1207del], p.[(Val296Glyfs\*13)];(0?)] in exon 5 of *GAS2L2* in affected subject DCP-1040 of family DC-630, proband 2-1. As both deletions overlap, c.887\_890del was seen as hemizygote; allele *in trans* of 867\_\*343+1207del was not co-amplified because of higher amplicon size (3,931 bp compared to 267 bp for the 867\_\*343+1207del allele PCR product). Base sequences, amino acid sequences, and codon numbers are shown. Mutated amino acids are represented by red fonts.

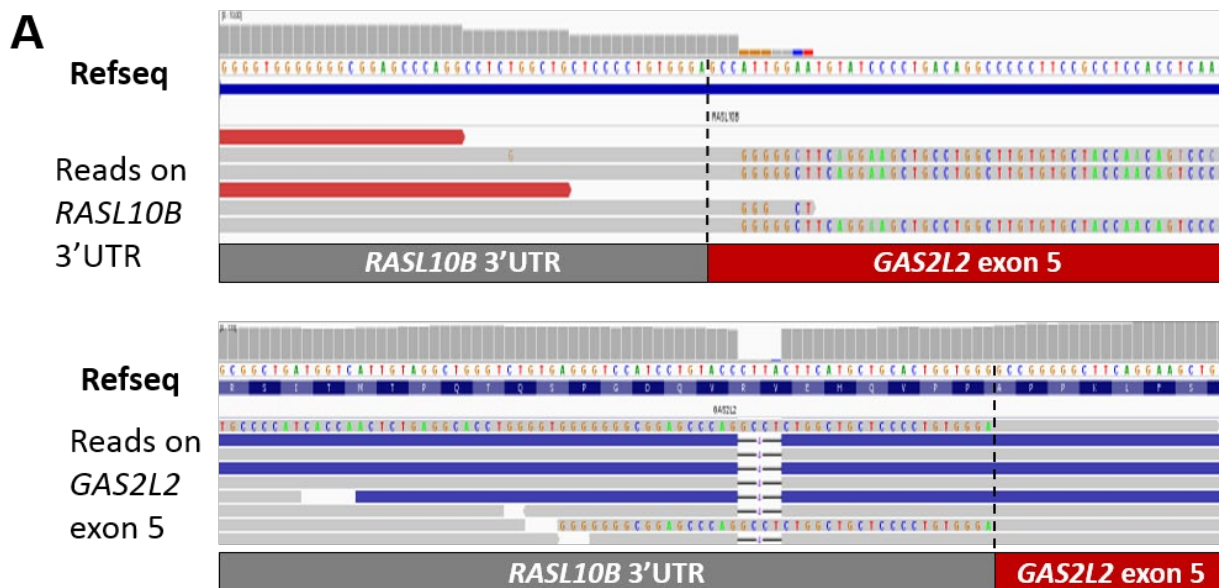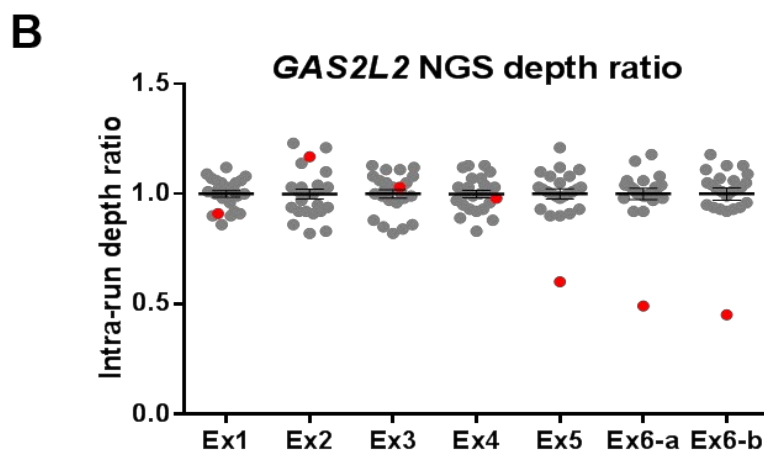

**Figure S2: Proband DCP-1040 is an obligatory compound heterozygous.**

(A) Breakpoints of the c.867\_\*343+1207del large deletion (3,931 nucleotides) in *GAS2L2*. Panels show overlapping read sequences aligned on *RASL10B* (upper) or *GAS2L2* (lower). The 5'-breakpoint localizes within *GAS2L2* exon 5 and 3'-end is within the 3'UTR of *RASL10B*. The lower panel also shows 7 reads encompassing the 4-nucleotide c.887\_890del *GAS2L2* deletion, which demonstrates the compound heterozygous genotype. Parallel sequencing data are shown as not reverse-complemented in the IGV viewer.

(B) *GAS2L2* copy-number variation analysis in subject DCP-1040 by parallel sequencing depth ratio analysis. Plot shows normalized depth ratio for 24 subjects analyzed within the same run. Mean depth for each capture probe was first normalized for each subject against the contribution of each subject to the run global depth. For each probe, the mean of the normalized depth ratio was calculated and adjusted to 1. Each point corresponds to the depth ratio of each controls (n= 23 grey symbols) or subject DCP1040 (red symbols). Error bars show the standard error of the mean. Exon 6, which is a large exon, was captured by two probes (Ex6-a and Ex6-b). Data highlight a heterozygous loss of most of exon 5 and entire exon 6.

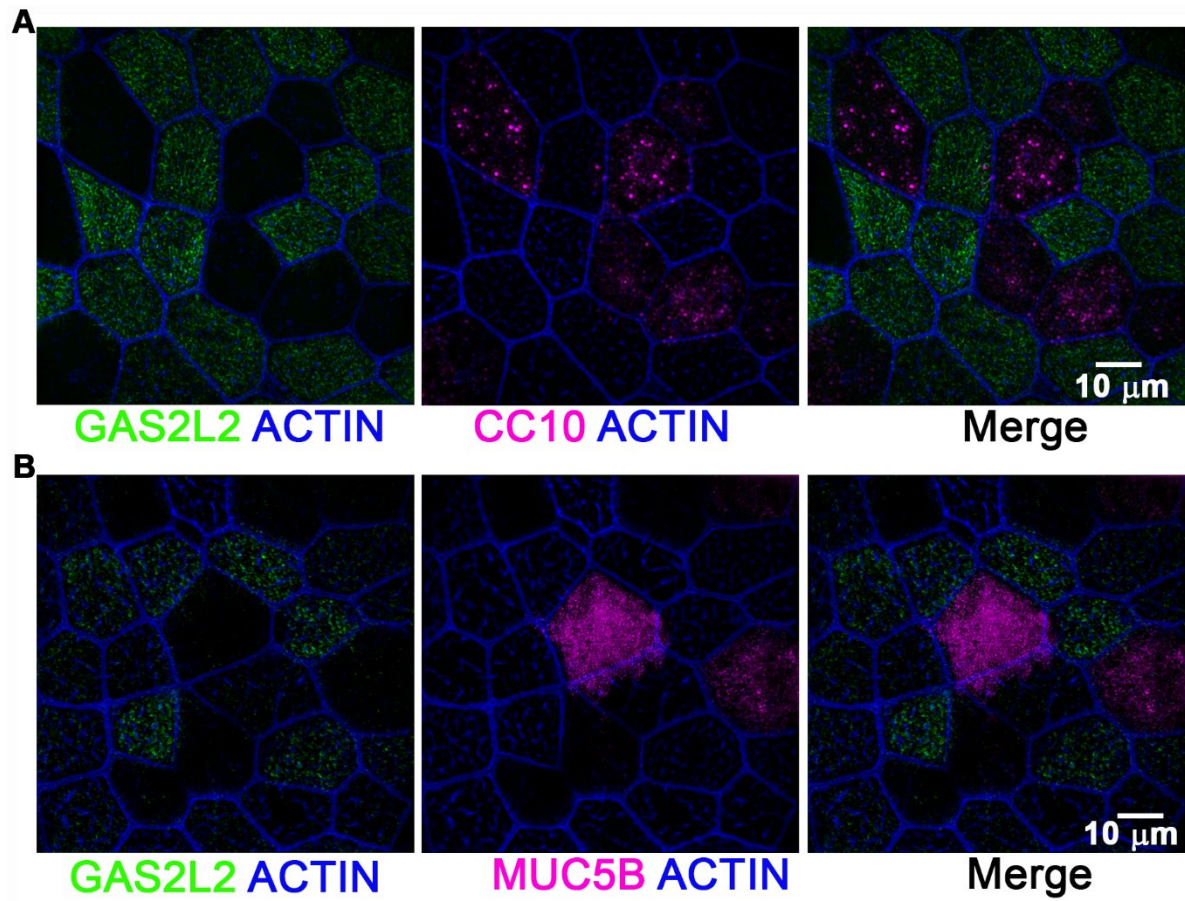

**Figure S3: GAS2L2 is not expressed in airway secretory cells:** Normal HBE cell were cultured at ALI and whole cultures were stained for GAS2L2 (green) and A) CC10, a club cell specific marker (n=3) or B) MUC5B a goblet cell specific marker (n=3).

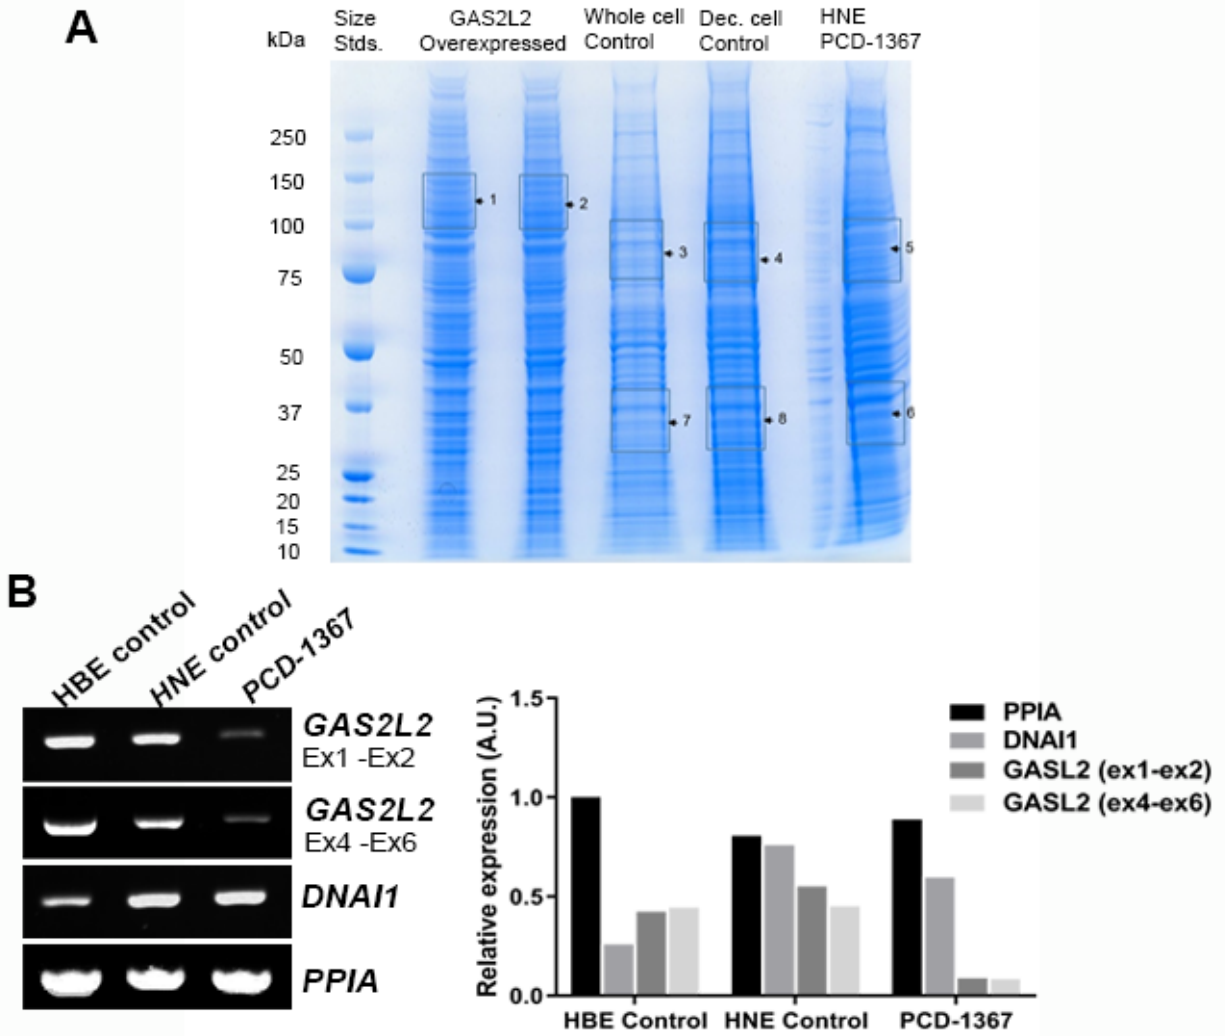

**Figure S4: Detection of *GAS2L2* in HNE cells from subject PCD-1367.**

(A) Separation of proteins for *GAS2L2* targeted proteomics analysis. Proteins were separated on a 4-12% gradient polyacrylamide gel as described in supplementary methods and stained with Coomassie blue to visualize proteins. The gel was cut into the boxed sections for analysis by mass spectrometry.

(B) Total RNA was isolated from cultured control HBE cells, control HNE cells, and PCD HNE cells (PCD-1367). RT-PCR and corresponding normalization confirmed decreased expression of *GAS2L2* in PCD HNE cells.



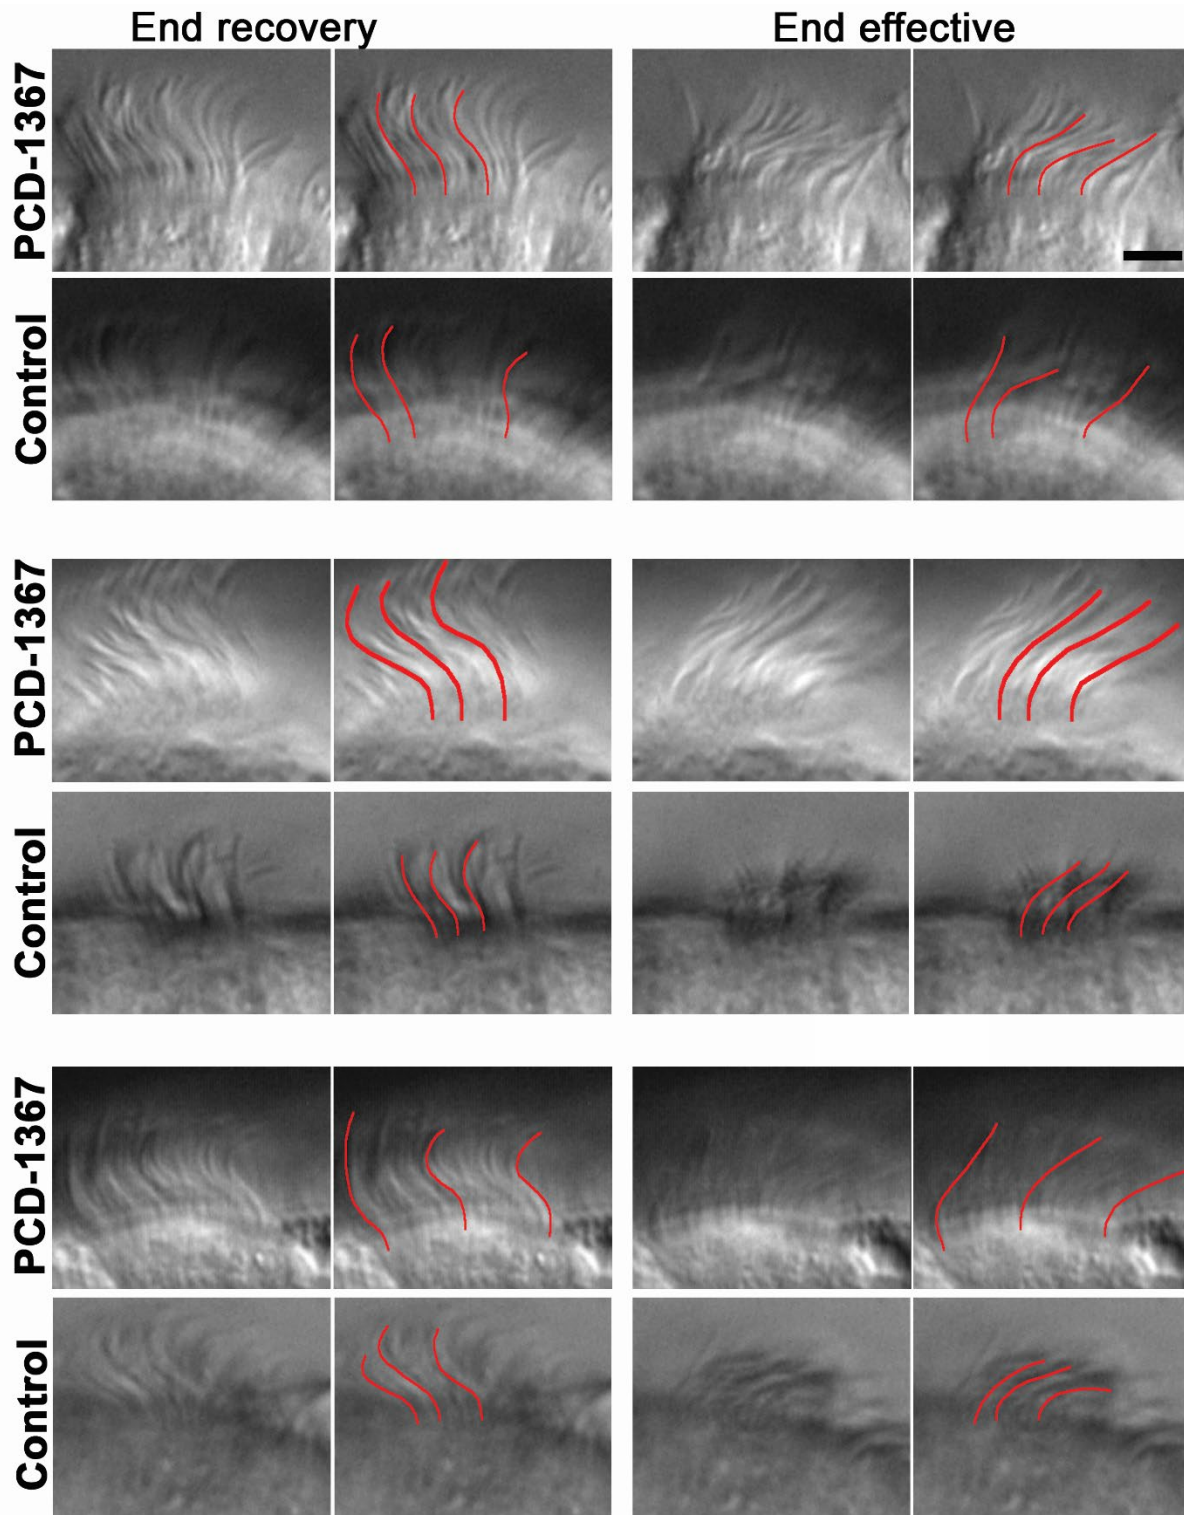

**Figure S5: Normal waveform of ciliary beat in *GAS2L2* deficient cells.** High-resolution videos of control and PCD ciliated cells were observed and the waveform was traced manually. The images represent a time point of the cilia seen in profile during the end recovery (left panels) and end effective positions (right panels). For each stroke position, a panel highlighting the cilia in red is shown. Scale bar, 4  $\mu$ m.

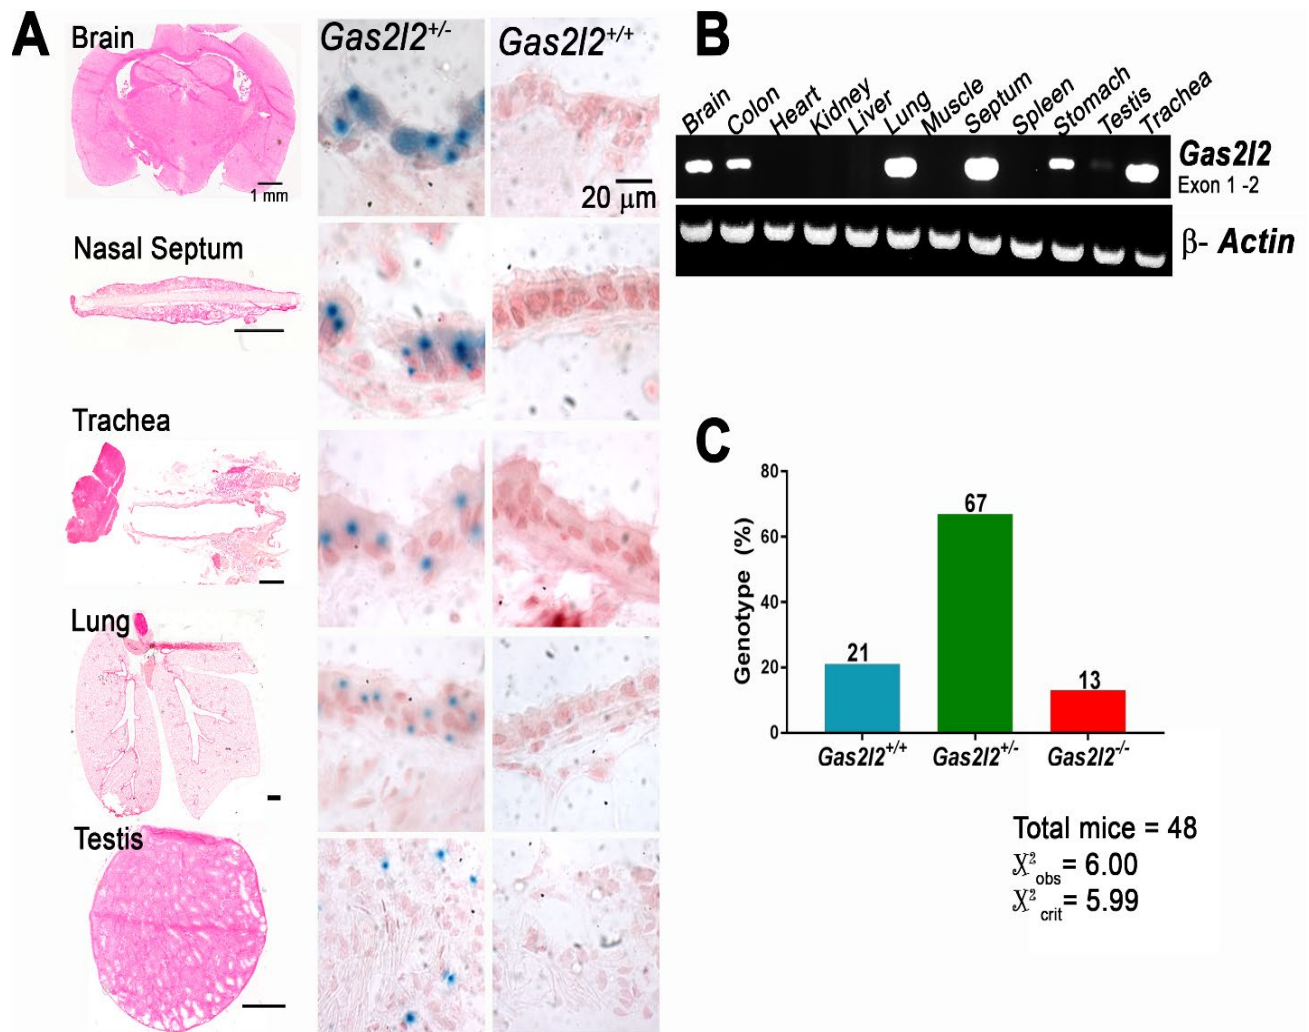

**Figure S6: Expression of *Gas2l2* in mouse tissue and the effects of lack of *Gas2l2* on Mendelian distribution.**

(A)  $\beta$ -galactosidase staining of different mouse tissue. The whole tissue section is shown in the left panel. Positive  $\beta$ -galactosidase staining was observed in tissues from *Gas2l2*<sup>+/-</sup> mice carrying the *LacZ* reporter (middle panel). No staining was observed in *Gas2l2*<sup>+/+</sup> mice (negative control, right panel).

(B) Total RNA from different mouse tissues was extracted and the expression of *Gas2l2* was evaluated by RT-PCR. Reference,  $\beta$ -*Actin*.

(C) Inheritance ratio in *Gas2l2*<sup>+/-</sup> cross follows Mendelian distribution.

**A**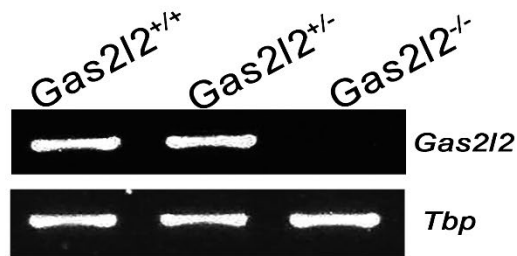**B**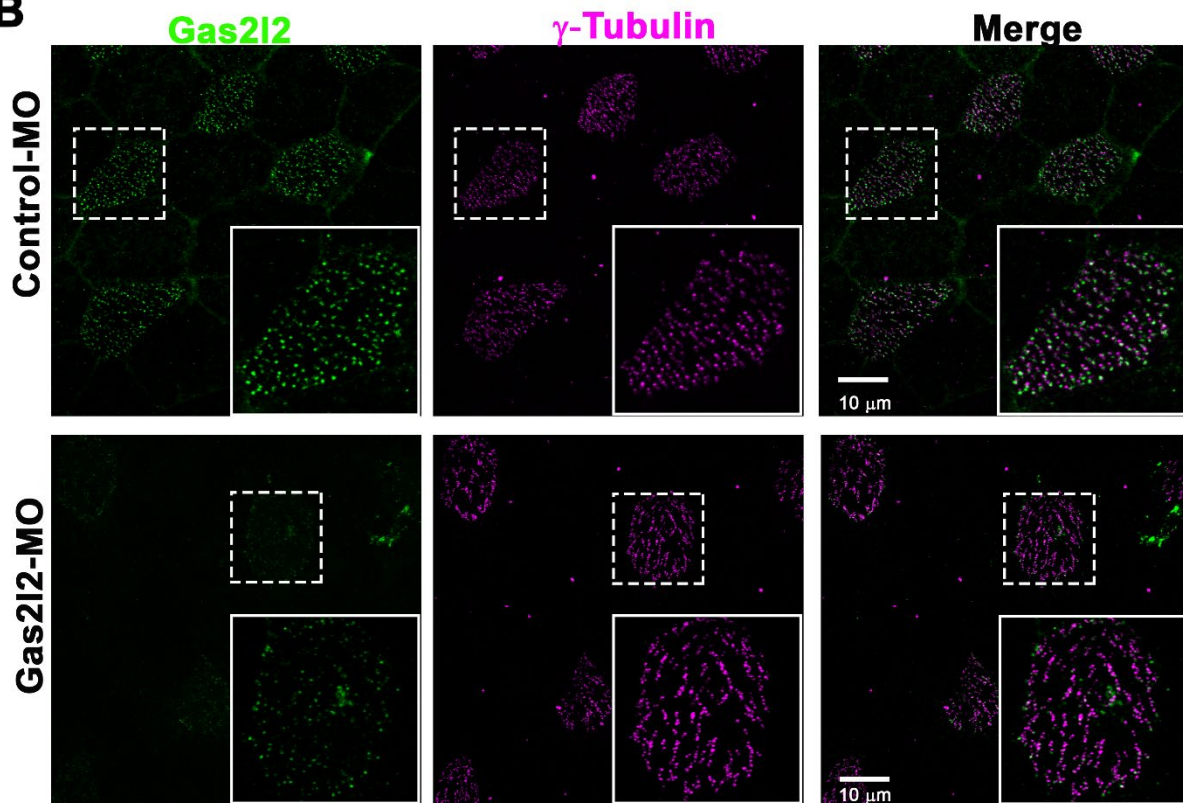

**Figure S7: Confirmation of the absence of Gas2l2.**

(A) Total RNA was isolated from embryonic mTEC cultures. RT-PCR confirmed the absence of *Gas2l2* expression in *Gas2l2*<sup>-/-</sup> cultures.

(B) Immunofluorescence of *X. laevis* embryos stained for Gas2l2 (green) and  $\gamma$ -Tubulin to visualize basal bodies (magenta). *X. laevis* embryos treated with *Gas2l2*-MO had reduced positive staining for Gas2l2.



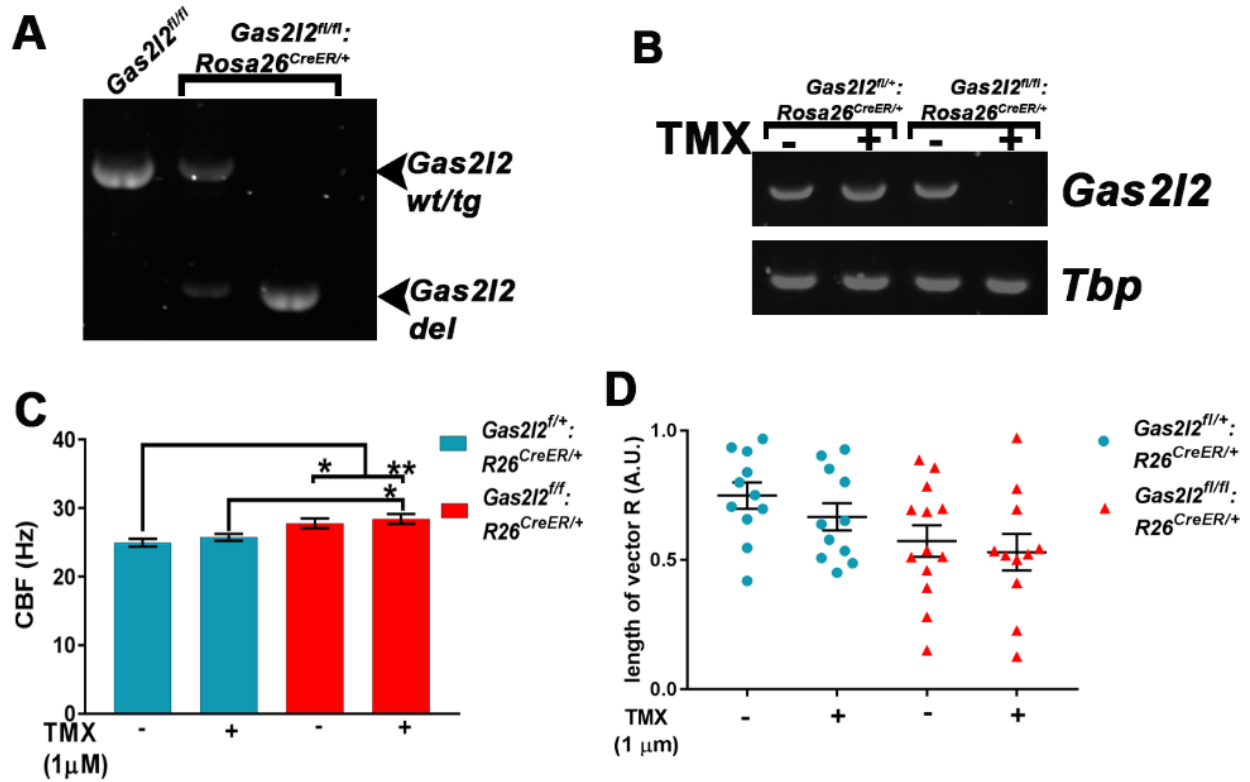

**Figure S8: mTEC cultures from *Gas2l2*<sup>-/-</sup>:*R26*<sup>CreER/+</sup> mice had affected ciliary beat and orientation.**

(A) RT-PCR confirmed the spontaneous deletion of *Gas2l2* in *Gas2l2*<sup>-/-</sup>:*R26*<sup>CreER/+</sup> mice. Mice with 100% deletion did not survive.

(B) The deletion of *Gas2l2* in mTEC cultures treated with tamoxifen (TMX) was corroborated by RT-PCR.

(C) The CBF in *Gas2l2*<sup>-/-</sup>:*R26*<sup>CreER/+</sup> mTEC cultures treated with TMX was hyperkinetic compared to control (n = 3 biological replicates, 3 technical replicates each. \*\* p = 0.0019, \* p < 0.05).

(D) The orientation of basal body-basal foot was scored in EM images. The length of the vector (0 < R < 1) for each cells is represented in the graph. The average length of the vector was shorter in *Gas2l2*<sup>-/-</sup>:*R26*<sup>CreER/+</sup> ciliated cells treated with TMX compared to control cells.

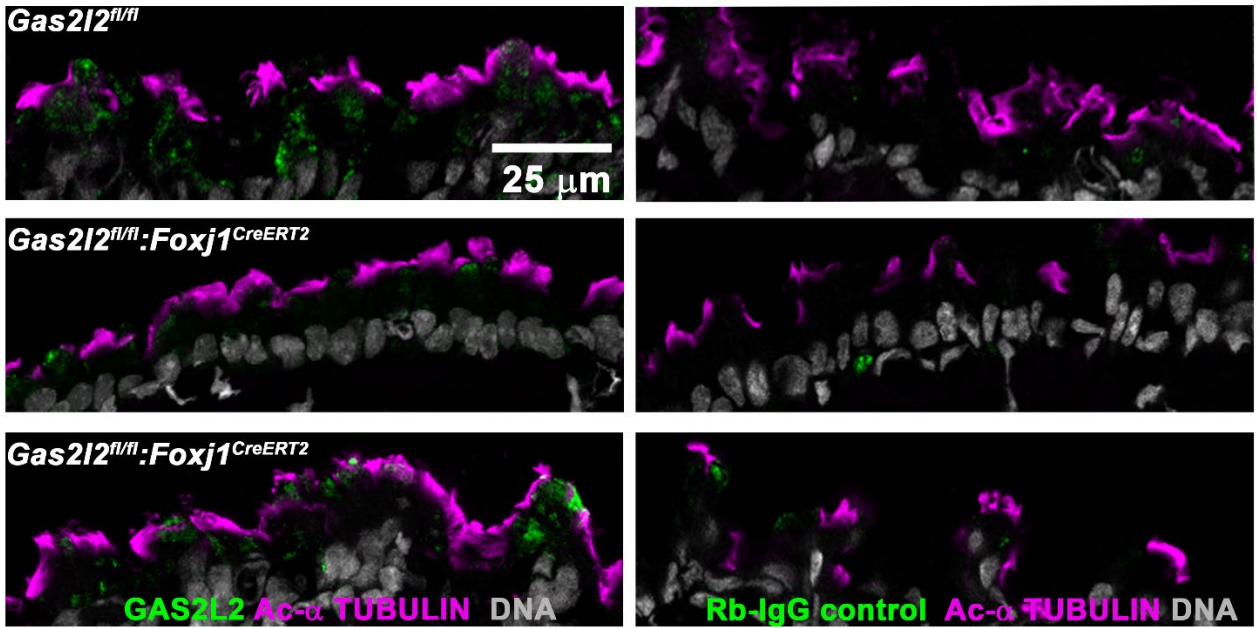

**Figure S9: Confirmation of partial deletion of *Gas2l2*.** Trachea sections of control and *Gas2l2* conditional-KO mice treated with TMX were stained for GAS2L2 (green), Acetylated-  $\alpha$  TUBULIN (magenta), and DNA (gray) (left panels). In the *Gas2l2* conditional-KO two patterns of staining were observed: mice with reduced positive staining for GAS2L2 (middle panel) and mice with close to normal positive staining (bottom panel). The corresponding negative control using anti-rabbit-IgG is shown (right panels).

**Table S1: Genes, implicated in PCD, analyzed by targeted capture parallel sequencing**

| <b>Gene</b>     | <b>References*</b>                                                                                                                                                                                                                                                                                                                           |
|-----------------|----------------------------------------------------------------------------------------------------------------------------------------------------------------------------------------------------------------------------------------------------------------------------------------------------------------------------------------------|
| <i>ARMC4</i>    |                                                                                                                                                                                                                                                                                                                                              |
| <i>C21ORF59</i> |                                                                                                                                                                                                                                                                                                                                              |
| <i>CCDC39</i>   |                                                                                                                                                                                                                                                                                                                                              |
| <i>CCDC40</i>   |                                                                                                                                                                                                                                                                                                                                              |
| <i>CCDC65</i>   |                                                                                                                                                                                                                                                                                                                                              |
| <i>CCDC103</i>  |                                                                                                                                                                                                                                                                                                                                              |
| <i>CCDC114</i>  |                                                                                                                                                                                                                                                                                                                                              |
| <i>CCDC151</i>  |                                                                                                                                                                                                                                                                                                                                              |
| <i>CCNO</i>     |                                                                                                                                                                                                                                                                                                                                              |
| <i>DNAAF1</i>   |                                                                                                                                                                                                                                                                                                                                              |
| <i>DNAAF2</i>   | Zariwala, M.A., Knowles, M.R., and Leigh, M.W. (2007 [Updated 2015]). Primary Ciliary Dyskinesia. In GeneReviews(R), R.A. Pagon, M.P. Adam, H.H. Ardinger, S.E. Wallace, A. Amemiya, L.J.H. Bean, T.D. Bird, N. Ledbetter, H.C. Mefford, R.J.H. Smith, et al., eds. (Seattle (WA), University of Washington, Seattle; 1993-2017 <sup>1</sup> |
| <i>DNAAF3</i>   |                                                                                                                                                                                                                                                                                                                                              |
| <i>DNAAF4</i>   |                                                                                                                                                                                                                                                                                                                                              |
| <i>DNAAF5</i>   |                                                                                                                                                                                                                                                                                                                                              |
| <i>DNAH5</i>    |                                                                                                                                                                                                                                                                                                                                              |
| <i>DNAH11</i>   |                                                                                                                                                                                                                                                                                                                                              |
| <i>DNAI1</i>    |                                                                                                                                                                                                                                                                                                                                              |
| <i>DNAI2</i>    |                                                                                                                                                                                                                                                                                                                                              |
| <i>DNAL1</i>    |                                                                                                                                                                                                                                                                                                                                              |
| <i>DRC1</i>     |                                                                                                                                                                                                                                                                                                                                              |
| <i>DYX1C1</i>   |                                                                                                                                                                                                                                                                                                                                              |
| <i>HYDIN</i>    |                                                                                                                                                                                                                                                                                                                                              |
| <i>LRRC6</i>    |                                                                                                                                                                                                                                                                                                                                              |
| <i>MCIDAS</i>   |                                                                                                                                                                                                                                                                                                                                              |
| <i>NME8</i>     |                                                                                                                                                                                                                                                                                                                                              |
| <i>RPGR</i>     |                                                                                                                                                                                                                                                                                                                                              |
| <i>RSPH1</i>    |                                                                                                                                                                                                                                                                                                                                              |
| <i>RSPH3</i>    |                                                                                                                                                                                                                                                                                                                                              |
| <i>RSPH4A</i>   |                                                                                                                                                                                                                                                                                                                                              |
| <i>RSPH9</i>    |                                                                                                                                                                                                                                                                                                                                              |
| <i>SPAG1</i>    |                                                                                                                                                                                                                                                                                                                                              |
| <i>ZMYND10</i>  |                                                                                                                                                                                                                                                                                                                                              |
| <i>C11ORF70</i> | Höben I. M. et al 2018 <sup>2</sup> and Fassad et al 2018 <sup>3</sup>                                                                                                                                                                                                                                                                       |
| <i>DNAJB13</i>  | El Khouri E. et al 2016 <sup>4</sup>                                                                                                                                                                                                                                                                                                         |
| <i>GAS8</i>     | Olbrich H. et al 2015 <sup>5</sup>                                                                                                                                                                                                                                                                                                           |
| <i>LRRC56</i>   | Bonnefoy S. et al 2018 <sup>6</sup>                                                                                                                                                                                                                                                                                                          |
| <i>PIH1D3</i>   | Olcese C. et al 2017 <sup>7</sup> and Paff T. et al 2017 <sup>8</sup>                                                                                                                                                                                                                                                                        |
| <i>STK36</i>    | Edelbush C. et al 2017 <sup>9</sup>                                                                                                                                                                                                                                                                                                          |
| <i>TTC25</i>    | Wallmeier J. et al 2016 <sup>10</sup>                                                                                                                                                                                                                                                                                                        |

**(\*) References also listed in the main text**

**TableS2: Primer sequences for PCR amplification of genomic DNA for all of the six coding exons and splice junctions of *GAS2L2* and to amplify the breakpoint of the large deletion in *GAS2L2***

| <b>Position</b>         | <b>Primers (5'-3')</b>                                   |
|-------------------------|----------------------------------------------------------|
| Exon 1                  | F: ACACGGGAACCTCAGAATCA<br>R: CCAGAGCTAGCCTGTGCATT       |
| Exon 2                  | F: GAGGCTCAGGTCCTCTGG<br>R: AAGGGGGTGGGTTAGTGG           |
| Exon 3                  | F: AGAAACCTCAGGGGTGACCT<br>R: CATATTCTGGGAGACTTAGTGTCATT |
| Exon 4                  | F: TGGGTACATGGATGAGAGCA<br>R: GACATACCTCCCACCTCTGC       |
| Exon 5                  | F: TTGCCACTGTAGGTCCCACT<br>R: CCGAGGATCTGCTCCTTTTA       |
| Exon 5                  | F: GTGTTGCCACTGTAGGTCCC<br>R: GTCTCGGGGTAGAGGCACTG       |
| Exon 6                  | F: CCGGCCTGATGAGTCTCC<br>R: GCCAGGTCCACAGTGACG           |
| Intron 4                | F: GTGTTGCCACTGTAGGTCCC*                                 |
| <i>RAS10LB</i><br>3'UTR | R: AGCGGATGAAGGATGGCAGC*                                 |

\*: Primers used to amplify the breakpoint of the large deletion in *GAS2L2* [c.867\_\*343+1207del]



**TableS3: Primers used for human (h), mouse (m), and morpholinos sequence**

| <b>Primers used for RT-PCR</b>                           |                                                              |                                             |
|----------------------------------------------------------|--------------------------------------------------------------|---------------------------------------------|
| <b>Name</b>                                              | <b>Primer Sequence</b>                                       | <b>PCR Product Size (bp)</b>                |
| <b>h GAS2L2</b>                                          | F: TACCTTCCAGGCCAGGGACAAT<br>R: ATCTGGTCCAGGTTGCGGAAGT       | 309                                         |
| <b>h GAS2L2</b>                                          | F: TGGGACACACTGGGCCATTA<br>R: CCCTGAACTGGAAGAACGCA           | 685                                         |
| <b>h PPIA</b>                                            | F: CCGTGTTCTTCGACATTGCC<br>R: ACACCACATGCTTGCCATCC           | 371                                         |
| <b>h DNAI1</b>                                           | F: AGAGAAGGAGAAGGCAAAGACCCC<br>R: TGTA CT CAGGGAAGCTGGGGTTCT | 401                                         |
| <b>m Gas2l2</b>                                          | F: ATGTCTCAGCATGTGGGACA<br>R: GCAGCTCCTCATCAATTTCC           | 537                                         |
| <b>m Tbp</b>                                             | F: GCCTTCCACCTTATGCTCAG<br>R: TACTGCCTGCTGTTGTTGCT           | 200                                         |
| <b>m Actin</b>                                           | F: CATCACTATTGGCAACGAGC<br>R: GATCCACACAGAGTACTTGC           | 283                                         |
| <b>Primers used for Genotyping</b>                       |                                                              |                                             |
| <b>Genotype</b>                                          | <b>Primer Sequence</b>                                       | <b>PCR Product Size (bp)</b>                |
| <b>m Gas2l2<sup>+/+</sup> and m Gas2l2<sup>+/-</sup></b> | F: CAGGAGCAGGTGAGTATTTGGAGC<br>R: GGTCACATAGCCACAGGAGATT     | 264                                         |
| <b>m Gas2l2<sup>+/-</sup> and m Gas2l2<sup>-/-</sup></b> | F: CAGGAGCAGGTGAGTATTTGGAGC<br>R: TCGTGGTATCGTTATGCGCC       | 365                                         |
| <b>m Gas2l2<sup>fllox</sup></b>                          | F: CGAAGTTATGTCGAGATATCTAG<br>R: GCAGCTCCTCATCAATTTCC        | 604                                         |
| <b>m Gas2l2 targeted/ deleted</b>                        | F: GATGGAAGGAAGCTCAAGGCG<br>R: GACCATGGAGAATTGCACTGGG        | wt: 2009<br>targeted: 2090<br>deleted: 1139 |
| <b>GFP</b>                                               | F: CCACAAGTTCAGCGTGTCC<br>R: GGT GTT CTG CTG GTA GTG G       | 487                                         |
| <b>Cre</b>                                               | F: GCGGTCTGGCAGTAAAACTATC<br>R: GTGAAACAGCATTGCTGTCACTT      | 100                                         |
| <b>Morpholinos</b>                                       |                                                              |                                             |
| <b>Gas2l2 isoform 1</b>                                  | CACTG CCACCCTGATGAGTTGACAT                                   |                                             |
| <b>Gas2l2 isoform 2</b>                                  | GAGCTATACACATACACCTTCCAGA                                    |                                             |

**TableS4: Primary Antibodies**

| <b>Antibody Name</b>         | <b>host</b> | <b>company</b> | <b>Catalog#</b> | <b>dilution WB</b> | <b>dilution IF</b> | <b>dilution SR</b> |
|------------------------------|-------------|----------------|-----------------|--------------------|--------------------|--------------------|
| GAS2L2                       | rabbit      | Atlas          | HPA044370       | 1:1000             | 1:500              | 1:1000             |
| GAS2L2                       | mouse       | Sigma          | SAB1412937      | 1:1000             | 1:500              | 1:1000             |
| CROCC                        | rabbit      | Atlas          | HPA021191       | NT                 | 1:500              | 1:1000             |
| EB1                          | rabbit      | Atlas          | HPA003600       | 1:1000             | 1:500              | 1:1000             |
| EB3 (KT36)                   | rat         | Absea          | 010314H04       | 1:1000             | 1:500              | 1:1000             |
| ERICH3                       | goat        | Santa Cruz BT  | discontinued    | NT                 | 1:250              | NT                 |
| CENTRIN-2                    | rabbit      | Atlas          | HPA045880       | NT                 | 1:250              | 1:500              |
| Acetylated- $\alpha$ TUBULIN | mouse       | Sigma          | T7451           | NT                 | 1:1000             | NT                 |
| $\gamma$ -TUBULIN            | mouse       | Sigma          | T6557           | 1:1000             | 1:500              | 1:1000             |
| $\gamma$ -TUBULIN            | rabbit      | Biologend      | 620901          | NT                 | 1:250              | NT                 |
| CENTRIOLIN (C-9)             | mouse       | Santa Cruz BT  | SC-365521       | NT                 | 1:250              | NT                 |
| MUC5B (H-300)                | rabbit      | Santa Cruz BT  | SC-20119        | NT                 | 1:500              | NT                 |
| CC10 (E11)                   | mouse       | Santa Cruz BT  | SC-365992       | NT                 | 1:250              | NT                 |
| ACTIN                        | mouse       | Thermo Fisher  | MA511869        | 1:5000             | 1:500              | 1:1000             |

NT: not tested

**Table S5: Demographic, clinical phenotype and *GAS2L2* genetic variants in 2 PCD-affected individuals from 2 unrelated families**

| Family  | PCD #          | Sex | Age (yrs) | Ethnicity | nNO (nl/min)       | Ciliary structure | Other Clinical features                                                            | Allele 1     |                      |                        | Allele 2     |                        |                        |
|---------|----------------|-----|-----------|-----------|--------------------|-------------------|------------------------------------------------------------------------------------|--------------|----------------------|------------------------|--------------|------------------------|------------------------|
|         |                |     |           |           |                    |                   |                                                                                    | Exon/ Intron | Genetic variant      | Protein variant        | Exon/ Intron | Genetic variant        | Protein variant        |
| UNC-362 | 1367 (2-VI)    | M   | 56        | Caucasian | 342.6 <sup>a</sup> | Normal            | NRD: No<br>Bxsis<br>sinusitis<br>Otitis media<br>Situs Status: SS<br>Infertile     | Ex 5         | c.887_890del<br>TAAG | p.(Val296Gly<br>fs*13) | Ex 5         | c.887_890del<br>TAAG   | p.(Val296Gly<br>fs*13) |
| DC-630  | DCP-1040 (2-I) | F   | 11        | Caucasian | 47 <sup>b</sup>    | Normal            | NRD: No<br>Bxsis<br>sinusitis<br>Otitis media<br>Situs Status: SS<br>Fertility: ND | Ex 5         | c.887_890del<br>TAAG | p.(Val296Gly<br>fs*13) | Large del    | c.867_*343+1207<br>del | p.?                    |

Abbreviations: M, male; F, female; nNO, nasal nitric oxide; NRD, neonatal respiratory distress; Bxsis, bronchiectasis; SS, *situs solitus*; ND, not determined; Ex, exon; del, deletion.

<sup>a</sup> cutoff value of 77nl/min<sup>11</sup>

<sup>b</sup> cutoff value of 82.2 nl/min<sup>12</sup>

**Table S6: Dot product scores for the peptides selected for GAS2L2 targeted proteomics in the analyzed bands.**

| Peptides chosen for PRM                             | GAS2L2 overexpressed | Deciliated cells high band | Deciliated cells low band | H. Nasal GASL2 <sup>-/-</sup> high band | H. Nasal GASL2 <sup>-/-</sup> low band |
|-----------------------------------------------------|----------------------|----------------------------|---------------------------|-----------------------------------------|----------------------------------------|
| K.SSEQYLEAM <u>M</u> KEDLAEWLR.D [25, 42] (missed1) | 0.97*                | 0.77                       | 0.65                      | 0.72                                    | 0.66                                   |
| R.VGVSC <u>C</u> NGAAQPGTFQAR.D [94, 110]           | 0.98*                | 0.78                       | 0.94*                     | 0.51                                    | 0.86                                   |
| R.DNVSNFIQW <u>C</u> R.K [111, 121]                 | 0.99*                | 0.98*                      | 0.76                      | 0.5                                     | 0.78                                   |
| R.VGDSNTLIFIR.I [234, 244]                          | 0.95*                | 0.82                       | 0.92*                     | 0.46                                    | 0.51                                   |
| R.VQDGPSQTQPTMTISR.S [297, 312]                     | 0.97*                | 0.97*                      | 0.84                      | 0.67                                    | 0.56                                   |
| R.IPTSWVHEETDSWGTDAGNPTPQR.L [415, 438]             | 0.99*                | 0.97*                      | 0.77                      | 0.72                                    | 0.56                                   |

Peptide Key: (flanking residue).(Sequence).(flanking residue) [position in protein] (# missed cleavages, if any)

**M** = oxidized methionine

**C** = carbamidomethyl cysteine

\*: The dot product score > 0.9 is considered a valid ID<sup>13</sup>



## SUPPLEMENTAL METHODS

### Targeted proteomic analysis

Cell cultures were deciliated<sup>14</sup>. Following deciliation, the cell body fraction was lysed as described in main text. For proteomics analysis, samples were loaded onto 4–12% Nu-PAGE gradient gels (Novex) for separation. For targeted proteomics 2 sections were cut from each lane; one containing proteins between 80-120 kDa and one containing proteins between 25-45 kDa to detect peptides associated to full length and a possible truncated form of GAS2L2, respectively. Each section was subjected to in-gel trypsinization<sup>15</sup>. In-gel digests were separated by automated nanoflow liquid chromatography coupled to tandem mass spectrometry (LC-MS/MS) using a Thermo Easy nLC 1000 coupled to a QExactive HF mass spectrometer. First, a positive control (over-expressed GAS2L2-Halo tag) was analyzed in data-dependent acquisition (DDA) mode on the QExactive HF, where the 15 most abundant peptides were chosen for HCD fragmentation. Raw data were searched against a reviewed human Uniprot database using Sequest within Proteome Discoverer (Thermo, version 2.1) and only peptides with a false discovery rate (FDR) of  $\leq 5\%$  were further considered. Next, the full length and possible truncated GAS2L2 samples were analyzed using the QExactive HF in parallel reaction monitoring (PRM) mode to enhance selectivity and sensitivity<sup>16</sup>. Peptides were chosen from the DDA analysis based on location in the GAS2L2 sequence (between amino acid 25 and 438), quality of spectra, and scores. The target list for the PRM method included m/z as well as retention times (each target peptide should elute at the same time from sample to sample). The PRM method parameters were as follows: resolution set to 15,000; AGC target, 5e5; Maximum IT, 500 ms; and isolation window, 2 m/z. Skyline software was used

to compare the peptide PRM data acquired for GAS2L2 over-expressed (positive control) with the PRM data acquired for the high and low molecular weight gel slices from the GAS2L2 deficient (PCD-1367) samples.

### **B-Galactosidase staining**

Tissues from adult male and female *Gas2l2*<sup>+/-</sup> mice were dissected and frozen in OCT on dry ice. The frozen block was sectioned at 10 µm. The sections were fixed in cold 0.2% glutaraldehyde, 5mM EGTA, 2mM MgCl<sub>2</sub> in PBS pH7.4 for 10 min at room temperature. Samples were washed with wash solution: 0.1 M phosphate buffer pH 7.4, supplemented with 2 mM MgCl<sub>2</sub>, 0.01% Sodium deoxycholate and 0.02% NP-40, 3 times for 5 min. Samples were immersed in staining solution (washing solution containing: 2 mg/ml X-gal ([5-bromo-4-chloro-3-indolyl-β-D-Galactopyranoside; Cayman Chemical Co. #16495] stock 50 mg/ml in dimethylformamide), 5mM K<sub>3</sub>Fe(CN)<sub>6</sub>, K<sub>4</sub>Fe(CN)<sub>6</sub> (Sigma) and incubated over night at room temperature in the dark. The next day slides were washed with wash solution 3 x 5 min. Samples were counter-stained with 1% nuclear fast red for 30s and thoroughly washed in water. Samples were dehydrated and mounted with Permount. Images were taken with an Olympus VS120 virtual slide Scanner microscope.

### **REFERENCES**

1. Zariwala, M.A., Knowles, M.R., and Leigh, M.W. (2007 [Updated 2015]). Primary Ciliary Dyskinesia. In GeneReviews(R), R.A. Pagon, M.P. Adam, H.H. Ardinger, S.E. Wallace, A. Amemiya, L.J.H. Bean, T.D. Bird, N. Ledbetter, H.C. Mefford, R.J.H. Smith, et al., eds. (Seattle (WA), University of Washington, Seattle; 1993-2017
2. Hoben, I.M., Hjeij, R., Olbrich, H., Dougherty, G.W., Nothe-Menchen, T., Aprea, I., Frank, D., Pennekamp, P., Dworniczak, B., Wallmeier, J., et al. (2018). Mutations in C11orf70 Cause Primary Ciliary Dyskinesia with Randomization of Left/Right Body Asymmetry Due to Defects of Outer and Inner Dynein Arms. American journal of human genetics 102, 973-984.

3. Fassad, M.R., Shoemark, A., le Borgne, P., Koll, F., Patel, M., Dixon, M., Hayward, J., Richardson, C., Frost, E., Jenkins, L., et al. (2018). C11orf70 Mutations Disrupting the Intraflagellar Transport-Dependent Assembly of Multiple Axonemal Dyneins Cause Primary Ciliary Dyskinesia. *American journal of human genetics* 102, 956-972.
4. El Khouri, E., Thomas, L., Jeanson, L., Bequignon, E., Vallette, B., Duquesnoy, P., Montantin, G., Copin, B., Dastot-Le Moal, F., Blanchon, S., et al. (2016). Mutations in DNAJB13, Encoding an HSP40 Family Member, Cause Primary Ciliary Dyskinesia and Male Infertility. *The American Journal of Human Genetics* 99, 489-500.
5. Olbrich, H., Cremers, C., Loges, N.T., Werner, C., Nielsen, K.G., Marthin, J.K., Philipsen, M., Wallmeier, J., Pennekamp, P., Menchen, T., et al. (2015). Loss-of-Function GAS8 Mutations Cause Primary Ciliary Dyskinesia and Disrupt the Nexin-Dynein Regulatory Complex. *American journal of human genetics* 97, 546-554.
6. Bonnefoy, S., Watson, C.M., Kernohan, K.D., Lemos, M., Hutchinson, S., Poulter, J.A., Crinnion, L.A., Berry, I., Simmonds, J., Vasudevan, P., et al. (2018). Biallelic Mutations in LRRC56, Encoding a Protein Associated with Intraflagellar Transport, Cause Mucociliary Clearance and Laterality Defects. *American journal of human genetics* 103, 727-739.
7. Olcese, C., Patel, M.P., Shoemark, A., Kiviluoto, S., Legendre, M., Williams, H.J., Vaughan, C.K., Hayward, J., Goldenberg, A., Emes, R.D., et al. (2017). X-linked primary ciliary dyskinesia due to mutations in the cytoplasmic axonemal dynein assembly factor PIH1D3. *8*, 14279.
8. Paff, T., Loges, N.T., Aprea, I., Wu, K., Bakey, Z., Haarman, E.G., Daniels, J.M.A., Sistermans, E.A., Bogunovic, N., Dougherty, G.W., et al. (2017). Mutations in PIH1D3 Cause X-Linked Primary Ciliary Dyskinesia with Outer and Inner Dynein Arm Defects. *The American Journal of Human Genetics* 100, 160-168.
9. Edelbusch, C., Cindric, S., Dougherty, G.W., Loges, N.T., Olbrich, H., Rivlin, J., Wallmeier, J., Pennekamp, P., Amirav, I., and Omran, H. (2017). Mutation of serine/threonine protein kinase 36 (STK36) causes primary ciliary dyskinesia with a central pair defect. *Human mutation* 38, 964-969.
10. Wallmeier, J., Shiratori, H., Dougherty, Gerard W., Edelbusch, C., Hjeij, R., Loges, Niki T., Menchen, T., Olbrich, H., Pennekamp, P., Raidt, J., et al. (2016). TTC25 Deficiency Results in Defects of the Outer Dynein Arm Docking Machinery and Primary Ciliary Dyskinesia with Left-Right Body Asymmetry Randomization. *The American Journal of Human Genetics* 99, 460-469.
11. Leigh, M.W., Hazucha, M.J., Chawla, K.K., Baker, B.R., Shapiro, A.J., Brown, D.E., LaVange, L.M., Horton, B.J., Qaqish, B., Carson, J.L., et al. (2013). Standardizing Nasal Nitric Oxide Measurement as a Test for Primary Ciliary Dyskinesia. *Annals of the American Thoracic Society* 10, 574-581.
12. Beydon, N., Chambellan, A., Alberti, C., Blic, J.d., Clément, A., Escudier, E., and Bourgeois, M.L. (2015). Technical and practical issues for tidal breathing measurements of nasal nitric oxide in children. *Pediatric pulmonology* 50, 1374-1382.
13. Yen, C.-Y., Houel, S., Ahn, N.G., and Old, W.M. (2011). Spectrum-to-Spectrum Searching Using a Proteome-wide Spectral Library. *Molecular & cellular proteomics : MCP* 10, M111.007666.
14. Blackburn, K., Bustamante-Marin, X., Yin, W., Goshe, M.B., and Ostrowski, L.E. (2017). Quantitative Proteomic Analysis of Human Airway Cilia Identifies Previously Uncharacterized Proteins of High Abundance. *Journal of proteome research* 16, 1579-1592.
15. Wilm, M., Shevchenko, A., Houthaeve, T., Breit, S., Schweigerer, L., Fotsis, T., and Mann, M. (1996). Femtomole sequencing of proteins from polyacrylamide gels by nano-electrospray mass spectrometry. *Nature* 379, 466.

16. Gallien, S., Bourmaud, A., Kim, S.Y., and Domon, B. (2014). Technical considerations for large-scale parallel reaction monitoring analysis. *Journal of Proteomics* 100, 147-159.
